# Supplementary material
Source: HighWire-hosted journal article supplement (https://bmjopen.bmj.com/content/13/9/e074217)
Supplement: inline-supplementary-material-1 [file inline-supplementary-material-1.pdf]

Supplement 1: MRC/UVRI & LSHTM Uganda Research Unit and LSHTM

Questionnaire: Adult version

Table of contents

- Section 100: Respondent and household characteristics
- Section 200: Washington Group Short Set Enhanced
- Section 300: Quality of life
- Section 400: Health condition and nutrition
- Section 500: Health care utilization
- Section 600: Participation
- Section 700: Attitudes
- Section 800: PLA-D specific questions

|     |                                 |                                                                                                                                                                   |
|-----|---------------------------------|-------------------------------------------------------------------------------------------------------------------------------------------------------------------|
| Nr. |                                 |                                                                                                                                                                   |
| 001 | LOCATION ID NUMBER              |                                                                                                                                                                   |
| 002 | ID NUMBER                       |                                                                                                                                                                   |
| 003 | INTERVIEW TYPE                  | 1=Person with disabilities (direct)<br>2=Proxy for person with disabilities (unable to communicate/understand)<br>2=Proxy for person with disabilities (child<18) |
| 004 | Interviewer 1 initials and code |                                                                                                                                                                   |
| 005 | Date of interview               | ____ 2023<br>(DAY MONTH)                                                                                                                                          |
| 006 | Time start interview            | __ hrs __ min                                                                                                                                                     |
| 007 | Time end interview              | __ hrs __ min                                                                                                                                                     |

**SECTION 100 - RESPONDENT AND HOUSEHOLD CHARACTERISTICS (WOPS)**

**I am going to start by asking you some questions about yourself and your living situation.**

|      |                                                                                                        |                                                                                                                                                                           |
|------|--------------------------------------------------------------------------------------------------------|---------------------------------------------------------------------------------------------------------------------------------------------------------------------------|
| 101  | SEX                                                                                                    | 1= Male<br>2= Female                                                                                                                                                      |
| 102  | How old are you now?                                                                                   | Years.....                                                                                                                                                                |
| 103  | In what year were you born?<br><b>IF KNOWN INCLUDE DATE OF BIRTH; CORRECT INCONSISTENCIES WITH AGE</b> | Year of birth....<br><br>Date of birth<br>...../...../.....                                                                                                               |
| 104  | What is current marital status?                                                                        | 1= Single/ Never married<br>2= Married / Cohabiting<br>3= Divorced / Separated<br>4= Widowed                                                                              |
| 105  | What is / was your occupation?<br>Any other?<br><b>TICK ALL THAT APPLY</b>                             | House work<br>Farming<br>Fishing<br>Labouring (e.g. clearing streets, weeding)<br>Tailoring<br>Teacher / nurse<br>Government administration<br>Shop attendant<br>other,   |
| 105a | Other <u>spouse</u> occupation SPECIFY                                                                 | _____                                                                                                                                                                     |
| 106  | What is / was <u>your spouse's</u> occupation? Any other?<br><b>TICK ALL THAT APPLY</b>                | House work<br>Farming<br>Fishing<br>Labouring(e.g. clearing streets, weeding etc)<br>Tailoring<br>Teacher / nurse<br>Government administration<br>Shop attendant<br>Other |
| 106a | Other <u>respondent</u> occupation SPECIFY                                                             | _____                                                                                                                                                                     |
| 107  | Are you still working?                                                                                 | 1= Yes, full-time<br>1a= Yes, part-time<br>1b= Yes, self-employed                                                                                                         |

3

|     |                                                                |                                                                                                                                                                                                                                                                                                        |
|-----|----------------------------------------------------------------|--------------------------------------------------------------------------------------------------------------------------------------------------------------------------------------------------------------------------------------------------------------------------------------------------------|
|     |                                                                | 1c= No, retired<br>2= No                                                                                                                                                                                                                                                                               |
| 108 | What is your highest level of education?                       | 1= No formal education<br>2= Less than primary (incomplete) school<br>3= Completed primary school<br>4= complete O level<br>5= Completed A level<br>6= Higher education than secondary school (diploma course or BTVET)<br>7= Adult education only<br>8= College/ University or more<br>88= Don't know |
| 109 | What is the total number of people who live in your household? | <input type="text"/> <input type="text"/><br>Persons                                                                                                                                                                                                                                                   |

**LIVING CONDITIONS**

|     |                                                    |                                                                                                                            |
|-----|----------------------------------------------------|----------------------------------------------------------------------------------------------------------------------------|
| 110 | What is the predominant material used for roofing? | 1= Thatch<br>2= Tile<br>3= Iron sheets<br>4= Mixed iron/tile<br>5= Other                                                   |
| 111 | What is the state of the roof?                     | 1= Very Good<br>1= Good<br>2= Moderate<br>3= Bad<br>4= Very bad                                                            |
| 112 | What are the walls of the house made of?           | 1= Burned brick<br>2= Unburned brick<br>3= Mud                                                                             |
| 113 | What is the house floor made of?                   | 1= Mud<br>2= Cement<br>3= Tiles                                                                                            |
| 114 | Who owns the house?                                | 1= Self<br>2= Spouse<br>3= Respondent's children<br>4= Someone else in the household<br>5= Renting (landlord)<br>87= Other |

3

**SECTION 200: Washington Group Enhanced Set**

|            |                                                                                                                                                                                       |                                                                                         |
|------------|---------------------------------------------------------------------------------------------------------------------------------------------------------------------------------------|-----------------------------------------------------------------------------------------|
|            |                                                                                                                                                                                       |                                                                                         |
| <b>201</b> | Do you have difficulty seeing even when wearing your glasses/contact lenses? Would you say....                                                                                        | 1= No difficulty<br>2= Some difficulty<br>3= A lot of difficulty<br>4= Cannot do at all |
| <b>202</b> | Do you have difficulty hearing, even when using a hearing aid(s)? Would you say...                                                                                                    | 1= No difficulty<br>2= Some difficulty<br>3= A lot of difficulty<br>4= Cannot do at all |
| <b>203</b> | Do you have difficulty walking or climbing steps? Would you say...                                                                                                                    | 1= No difficulty<br>2= Some difficulty<br>3= A lot of difficulty<br>4= Cannot do at all |
| <b>204</b> | Using your usual language do you have difficulty communicating, for example, understanding or being understood? Would you say...                                                      | 1= No difficulty<br>2= Some difficulty<br>3= A lot of difficulty<br>4= Cannot do at all |
| <b>205</b> | Do you have difficulty remembering or concentrating? Would you say...                                                                                                                 | 1= No difficulty<br>2= Some difficulty<br>3= A lot of difficulty<br>4= Cannot do at all |
| <b>206</b> | Do you have difficulty with self care, such as washing all over or dressing? Would you say...                                                                                         | 1= No difficulty<br>2= Some difficulty<br>3= A lot of difficulty<br>4= Cannot do at all |
| <b>207</b> | Do you have difficulty raising a 2 liter bottle of water or soda from the waist to eye level? Would you say...                                                                        | 1= No difficulty<br>2= Some difficulty<br>3= A lot of difficulty<br>4= Cannot do at all |
| <b>208</b> | Do you have difficulty using your hands and fingers, such as picking up small objects, for example, a button or pencil, or opening or closing containers or bottles? Would you say... | 1= No difficulty<br>2= Some difficulty<br>3= A lot of difficulty<br>4= Cannot do at all |
| <b>209</b> | How often do you feel worried, nervous or anxious? Would you say...                                                                                                                   | 1= Daily<br>2= Weekly<br>3= Monthly<br>4= A few times a year<br>5= Never                |
|            | Thinking about the last time you felt worried, nervous or anxious, how would you describe the level of these feelings. Would you say...                                               | 1= A little<br>2= A lot<br>3= Somewhere between a little and a lot                      |
| <b>209</b> | How often do you feel depressed? Would you say...                                                                                                                                     | 1= Daily<br>2= Weekly<br>3= Monthly<br>4= A few times a year                            |

|     |                                                                                                                       |                                                                    |
|-----|-----------------------------------------------------------------------------------------------------------------------|--------------------------------------------------------------------|
|     |                                                                                                                       | 5= Never                                                           |
| 210 | Thinking about the last time you felt depressed, how would you describe the level of these feelings. Would you say... | 1= A little<br>2= A lot<br>3= Somewhere between a little and a lot |
| 211 | At what age did you first start experiencing these difficulties                                                       | ____ years<br>0 if age<1<br>999 if don't know                      |

**SECTION 300 QUALITY OF LIFE (WHO-QOL BREF)**

This assessment asks how you feel about your quality of life, health, or other areas of your life. Please answer all the questions. If you are unsure about which response to give to a question, please choose the one that appears most appropriate. This can often be your first response. Please keep in mind your standards, hopes, pleasures and concerns. We ask that you think about your life in the last two weeks.

|     |                                                                                            |                                                                                                                       |
|-----|--------------------------------------------------------------------------------------------|-----------------------------------------------------------------------------------------------------------------------|
|     |                                                                                            |                                                                                                                       |
| 301 | How would you rate your quality of life?                                                   | 1= Very poor<br>2= Poor<br>3= Neither poor nor good<br>4= Good<br>5= Very good                                        |
| 302 | How satisfied are you with your health?                                                    | 1= Very dissatisfied<br>2= Dissatisfied<br>3= Neither satisfied nor dissatisfied<br>4= Satisfied<br>5= Very satisfied |
| 303 | To what extent do you feel that physical pain prevents you from doing what you need to do? | 1= Not at all<br>2= A little<br>3= A moderate amount<br>4= Very much<br>5= An extreme amount                          |
| 304 | How much do you need any medical treatment to function in your daily life?                 | 1= Not at all<br>2= A little<br>3= A moderate amount<br>4= Very much<br>5= An extreme amount                          |
| 305 | How much do you enjoy life?                                                                | 1= Not at all<br>2= A little<br>3= A moderate amount<br>4= Very much<br>5= An extreme amount                          |
| 306 | To what extent do you feel your life to be meaningful?                                     | 1= Not at all<br>2= A little<br>3= A moderate amount<br>4= Very much<br>5= An extreme amount                          |

|     |                                                                                |                                                                                      |
|-----|--------------------------------------------------------------------------------|--------------------------------------------------------------------------------------|
| 307 | How well are you able to concentrate?                                          | 1= Not at all<br>2= A little<br>3= A moderate amount<br>4= Very much<br>5= Extremely |
| 308 | How safe do you feel in your daily life?                                       | 1= Not at all<br>2= A little<br>3= A moderate amount<br>4= Very much<br>5= Extremely |
| 309 | How healthy is your physical environment?                                      | 1= Not at all<br>2= A little<br>3= A moderate amount<br>4= Very much<br>5= Extremely |
| 310 | Do you have enough energy for your everyday activities?                        | 1= Not at all<br>2= A little<br>3= Moderately<br>4= Mostly<br>5= Completely          |
| 311 | Are you able to accept your bodily appearance?                                 | 1= Not at all<br>2= A little<br>3= Moderately<br>4= Mostly<br>5= Completely          |
| 312 | Have you enough money to meet your needs?                                      | 1= Not at all<br>2= A little<br>3= Moderately<br>4= Mostly<br>5= Completely          |
| 313 | How available to you is the information that you need in your day-to-day life? | 1= Not at all<br>2= A little<br>3= Moderately<br>4= Mostly<br>5= Completely          |
| 314 | To what extent do you have the opportunity for leisure activities?             | 1= Not at all<br>2= A little<br>3= Moderately<br>4= Mostly<br>5= Completely          |

|     |                                                                           |                                                                                                                       |
|-----|---------------------------------------------------------------------------|-----------------------------------------------------------------------------------------------------------------------|
| 315 | How well are you able to get around?                                      | 1=Very poor<br>2= Poor<br>3= Neither poor nor good<br>4= Good<br>5= Very good                                         |
| 316 | How satisfied are you with your sleep?                                    | 1= Very dissatisfied<br>2= Dissatisfied<br>3= Neither satisfied nor dissatisfied<br>4= Satisfied<br>5= Very satisfied |
| 317 | How satisfied are you with your ability to perform your daily activities? | 1= Very dissatisfied<br>2= Dissatisfied<br>3= Neither satisfied nor dissatisfied<br>4= Satisfied<br>5= Very satisfied |
| 318 | How satisfied are you with your capacity for work?                        | 1= Very dissatisfied<br>2= Dissatisfied<br>3= Neither satisfied nor dissatisfied<br>4= Satisfied<br>5= Very satisfied |
| 319 | How satisfied are you with yourself?                                      | 1= Very dissatisfied<br>2= Dissatisfied<br>3= Neither satisfied nor dissatisfied<br>4= Satisfied<br>5= Very satisfied |
| 320 | How satisfied are you with your personal relationships?                   | 1= Very dissatisfied<br>2= Dissatisfied<br>3= Neither satisfied nor dissatisfied<br>4= Satisfied<br>5= Very satisfied |
| 321 | How satisfied are you with your sex life?                                 | 1= Very dissatisfied<br>2= Dissatisfied<br>3= Neither satisfied nor dissatisfied<br>4= Satisfied<br>5= Very satisfied |
| 322 | How satisfied are you with the support you get from your friends?         | 1= Very dissatisfied<br>2= Dissatisfied<br>3= Neither satisfied nor dissatisfied<br>4= Satisfied<br>5= Very satisfied |



|     |                                                                                           |                                                                                                                       |
|-----|-------------------------------------------------------------------------------------------|-----------------------------------------------------------------------------------------------------------------------|
| 323 | How satisfied are you with the conditions of your living place?                           | 1= Very dissatisfied<br>2= Dissatisfied<br>3= Neither satisfied nor dissatisfied<br>4= Satisfied<br>5= Very satisfied |
| 324 | How satisfied are you with your access to health services?                                | 1= Very dissatisfied<br>2= Dissatisfied<br>3= Neither satisfied nor dissatisfied<br>4= Satisfied<br>5= Very satisfied |
| 325 | How satisfied are you with your transport?                                                | 1= Very dissatisfied<br>2= Dissatisfied<br>3= Neither satisfied nor dissatisfied<br>4= Satisfied<br>5= Very satisfied |
| 326 | How often do you have negative feelings such as blue mood, depair, anxiety or depression? | 1= Never<br>2= Infrequently<br>3= Sometimes<br>4= Frequently<br>5= Always                                             |

**SECTION 400: HEALTH CONDITIONS AND NUTRITION**

I am now going to ask some questions about your health

**Self-rated health**

|     |                                             |                                                      |
|-----|---------------------------------------------|------------------------------------------------------|
| 401 | In general, how would you rate your health? | 1= Good<br>2= Rather good<br>3= Poor<br>4= Very poor |
|-----|---------------------------------------------|------------------------------------------------------|

**Nutrition (WOPS)**

|     |                                                                                                                      |                                                                                                                        |
|-----|----------------------------------------------------------------------------------------------------------------------|------------------------------------------------------------------------------------------------------------------------|
| 402 | How many servings of <u>fruit</u> do you eat on a typical day?                                                       | Servings                                                                                                               |
| 403 | How many servings of <u>vegetables</u> do you eat on a typical day?                                                  | Servings                                                                                                               |
| 404 | In the <u>last 12 months</u> , were you ever hungry, but didn't eat because you couldn't afford enough food?         | 1 = Yes<br>2 = No                                                                                                      |
| 405 | In the <u>last 12 months</u> , how often did you eat less than you felt you should because there wasn't enough food? | 1= every month<br>2= almost every month<br>3= some months. But not every month<br>4= only in 1 or 2 months<br>5= Never |

**HEALTH STATUS (Model disability survey)**

|     | Have you been told by a doctor or health professional that you have... |                   | If yes, have you been given medicine or treatment in the last 6-12 months? |
|-----|------------------------------------------------------------------------|-------------------|----------------------------------------------------------------------------|
| 406 | Vision loss                                                            | 1 = Yes<br>2 = No |                                                                            |
| 407 | Hearing loss                                                           | 1 = Yes<br>2 = No |                                                                            |
| 408 | High blood pressure                                                    | 1 = Yes<br>2 = No |                                                                            |
| 409 | Diabetes                                                               | 1 = Yes<br>2 = No |                                                                            |
| 410 | Arthritis                                                              | 1 = Yes<br>2 = No |                                                                            |
| 411 | Heart disease, coronary disease, heart attack                          | 1 = Yes<br>2 = No |                                                                            |
| 412 | Chronic bronchitis or emphysema                                        | 1 = Yes           |                                                                            |

|     |                                               |                   |  |
|-----|-----------------------------------------------|-------------------|--|
|     |                                               | 2 = No            |  |
| 413 | Asthma, allergic, respiratory disease         | 1 = Yes<br>2 = No |  |
| 414 | Back pain or disc problems                    | 1 = Yes<br>2 = No |  |
| 415 | Migraine (recurrent headaches)                | 1 = Yes<br>2 = No |  |
| 416 | Stroke                                        | 1 = Yes<br>2 = No |  |
| 417 | Depression or anxiety                         | 1 = Yes<br>2 = No |  |
| 418 | Gastritis or ulcer                            | 1 = Yes<br>2 = No |  |
| 419 | Tumour or cancer                              | 1 = Yes<br>2 = No |  |
| 420 | Trauma                                        | 1 = Yes<br>2 = No |  |
| 421 | Dementia                                      | 1 = Yes<br>2 = No |  |
| 422 | Kidney disease                                | 1 = Yes<br>2 = No |  |
| 423 | Skin disease                                  | 1 = Yes<br>2 = No |  |
| 424 | Tuberculosis                                  | 1 = Yes<br>2 = No |  |
| 425 | Mental (psychiatric) or behavioural disorders | 1 = Yes<br>2 = No |  |

**Section 500: Health care utilization**

I would now like to know about your recent experiences with obtaining health care from health care workers, hospitals, clinics and the health care system. I want to know if you needed health care recently, and if so, why you needed health care provider you received care from.

|                                                                                                                                  |                                                                                                                                                                                                                                                                                                                                                                                                                                                                                                                                                                                                                                                                                                                                                                                                                                                                                                                                                    |                 |
|----------------------------------------------------------------------------------------------------------------------------------|----------------------------------------------------------------------------------------------------------------------------------------------------------------------------------------------------------------------------------------------------------------------------------------------------------------------------------------------------------------------------------------------------------------------------------------------------------------------------------------------------------------------------------------------------------------------------------------------------------------------------------------------------------------------------------------------------------------------------------------------------------------------------------------------------------------------------------------------------------------------------------------------------------------------------------------------------|-----------------|
| 501                                                                                                                              | In the last 2 years did you need health care?                                                                                                                                                                                                                                                                                                                                                                                                                                                                                                                                                                                                                                                                                                                                                                                                                                                                                                      | 1=Yes<br>2=No   |
| 502                                                                                                                              | The last time you needed health care, did you get health care?<br><b>If “yes” Skip to 504</b>                                                                                                                                                                                                                                                                                                                                                                                                                                                                                                                                                                                                                                                                                                                                                                                                                                                      | 1= Yes<br>2= No |
| <b>Interviewer: if respondent did not get health care, Q 502= “NO”, ask Q 503A, 503a,503b and 503l then Skip to question 511</b> |                                                                                                                                                                                                                                                                                                                                                                                                                                                                                                                                                                                                                                                                                                                                                                                                                                                                                                                                                    |                 |
| 503A                                                                                                                             | <b>Interviewer: Respondent can select ONLY one <u>main reason</u> for visit. Use showcard</b><br><b>If respondent is having difficulties answering, you can read the categories</b><br>What was the main reason you needed care, even if you did not get care?<br>1= Communicable diseases, infections, malaria, infection TB, HIV<br>2= Nutritional deficiencies<br>3= Acute conditions, (diarrhea, flu, headaches, fever, cough and others)<br>4= Injury (if FALLS record 4 and fill in FALLS in 403a (SPECIFY)<br>5= Surgery<br>6= Sleep problem<br>7= Occupational /work related condition/injury<br>8= Chronic pain in joints/arthritis (joints, back, neck)<br>9= Diabetes or related complications<br>10= Problems with heart including unexplained pain in chest<br>11= Problems with mouth, teeth, swallowing<br>12= Problems with breathing<br>13= High blood pressure, hypertension<br>14= Stroke/ sudden paralysis of one side of body |                 |

|      |                                                                                                                                                                              |                                                                                                                                                                                          |
|------|------------------------------------------------------------------------------------------------------------------------------------------------------------------------------|------------------------------------------------------------------------------------------------------------------------------------------------------------------------------------------|
|      |                                                                                                                                                                              |                                                                                                                                                                                          |
|      | 15= Generalized pain(stomach, muscle or other nonspecific pain)                                                                                                              |                                                                                                                                                                                          |
|      | 16= Depression, anxiety                                                                                                                                                      |                                                                                                                                                                                          |
|      | 17= Cancer                                                                                                                                                                   |                                                                                                                                                                                          |
|      | 87= Other                                                                                                                                                                    |                                                                                                                                                                                          |
| 503a | Other <u>main</u> reason SPECIFY                                                                                                                                             | _____                                                                                                                                                                                    |
| 503b | Which reason(s) best explains why you did not get health care?<br><br><b>Record all the numbers that respondent mentions spontaneously.</b>                                  |                                                                                                                                                                                          |
|      |                                                                                                                                                                              |                                                                                                                                                                                          |
|      | 1= could not afford the cost of the visit                                                                                                                                    |                                                                                                                                                                                          |
|      | 2= no transport available                                                                                                                                                    |                                                                                                                                                                                          |
|      | 3= could not afford the cost of the transport                                                                                                                                |                                                                                                                                                                                          |
|      | 4= you were previously badly treated                                                                                                                                         |                                                                                                                                                                                          |
|      | 5= could not make time off work or had other commitments                                                                                                                     |                                                                                                                                                                                          |
|      | 6= the health care provider's drugs or equipment were inadequate                                                                                                             |                                                                                                                                                                                          |
|      | 7= the health care provider's skills were inadequate                                                                                                                         |                                                                                                                                                                                          |
|      | 8= you did not know where to go                                                                                                                                              |                                                                                                                                                                                          |
|      | 9= you tried but were denied health care                                                                                                                                     |                                                                                                                                                                                          |
|      | 10= you thought you were not sick enough                                                                                                                                     |                                                                                                                                                                                          |
|      | 87= other                                                                                                                                                                    |                                                                                                                                                                                          |
| 503i | Other best reason why not get health care SPECIFY                                                                                                                            | _____<br>_____                                                                                                                                                                           |
| 504  | Thinking about health care you needed since last visit / in the last 2 years, where did you go most often when you felt sick or needed to consult someone about your health? | 1= Private doctor's office<br>2= Private clinic or health centre<br>3= Government / public clinic or health centre<br>4= Government / public hospital<br>5= Charity or church run clinic |

|      |                                                                                  |                                                           |
|------|----------------------------------------------------------------------------------|-----------------------------------------------------------|
|      | <b>Interviewer: <u>Only one answer</u> allowed</b>                               | (name specific ones)                                      |
|      |                                                                                  | 6= Charity or church run hospital<br>(name specific ones) |
|      |                                                                                  | 7= Traditional healers / herbalist<br>/shrine             |
|      |                                                                                  | 8= pharmacy                                               |
|      |                                                                                  | 9= Pastor or religious healer                             |
|      |                                                                                  | 87= other                                                 |
|      |                                                                                  |                                                           |
|      |                                                                                  |                                                           |
| 504a | How many visits do you make to a health facility in a year?                      | Number _____                                              |
| 505  | Did you have to pay fees for consultation and/or drugs? <b>If no skip to 507</b> | 1= Yes<br>2= No                                           |
| 506  | Who paid for the last visit?                                                     | Self                                                      |
|      |                                                                                  | Spouse                                                    |
|      |                                                                                  | Son/daughter                                              |
|      |                                                                                  | Other relative                                            |
|      |                                                                                  | Other not relative                                        |
|      |                                                                                  | Insurance                                                 |
|      |                                                                                  | was free                                                  |

**Interviewer ask Q 507, 508,509, and 510 ONLY when respondent use health services  
check Q 504**

**If not using health service skip to 511**

|      |                                                                                                                                                                  |                                                                                                                       |
|------|------------------------------------------------------------------------------------------------------------------------------------------------------------------|-----------------------------------------------------------------------------------------------------------------------|
| 507  | When you visit the health facility, how long do you usually have to wait before it is your turn to be seen by a nurse or doctor?                                 | 1= Not long<br>2= Quite long<br>3= Long<br>4= Very long                                                               |
| 508  | When you visit the health facility, do the health professionals usually give you the time to explain to them what your health problem is?                        | 1= Always<br>2= Most of the time<br>3= Sometimes<br>4= Not usually<br>5= Never                                        |
| 509  | When you visit the health facility, do the health professionals usually take the time to explain your health problem and treatment in a way that you understand? | 1= Always<br>2= Most of the time<br>3= Sometimes<br>4= Not usually<br>5= Never                                        |
| 509a | When you visit the health facility, do the health professionals usually take time to involve you in making decisions for your treatment? <sup>1</sup>            | 1= Always<br>2= Most of the time<br>3= Sometimes<br>4= Not usually<br>5= Never                                        |
| 510  | When you visit the health facility, are you treated respectfully?                                                                                                | 1= Always<br>2= Most of the time<br>3= Sometimes<br>4= Not usually<br>5= Never                                        |
| 511  | Overall, are you satisfied with the services?                                                                                                                    | 1= Very satisfied<br>2= Satisfied<br>3= Neither satisfied nor dissatisfied<br>4= Dissatisfied<br>5= Very dissatisfied |
| 512  | What are the reason(s) that people will go to the traditional healer for treatment?<br><b>TICK ALL THAT APPLY</b>                                                | Closer distance                                                                                                       |
|      |                                                                                                                                                                  | Traditional healer are cheaper                                                                                        |
|      |                                                                                                                                                                  | Traditional healer allow you to pay in kind/ with goods                                                               |
|      |                                                                                                                                                                  | Traditional healer will wait for payment                                                                              |
|      |                                                                                                                                                                  | Traditional healer is more knowledgeable about this                                                                   |

<sup>1</sup> Question added from Model Disability Survey

|      |                                                                                      |                                                                                          |
|------|--------------------------------------------------------------------------------------|------------------------------------------------------------------------------------------|
|      |                                                                                      | problem                                                                                  |
|      |                                                                                      | Traditional healers give better treatment                                                |
|      |                                                                                      | Decision made by caregiver or family                                                     |
| 512a | Have you visited a traditional healer for treatment?<br><b>If no skip to 513</b>     | 1= yes<br>2= no                                                                          |
| 512b | During the last 12 months/one year, how often have you visited a traditional healer? | 1 = Once or twice<br>2 = Three to six times<br>3 = More than six times<br>8 = Don't know |

**Health centre/clinic, hospital stays**

|     |                                                                                                                                                                                                                                                                                                                                                                                                                                                                                                                                                                                                                                                                                                                                                                                                                       |                                                                                                         |
|-----|-----------------------------------------------------------------------------------------------------------------------------------------------------------------------------------------------------------------------------------------------------------------------------------------------------------------------------------------------------------------------------------------------------------------------------------------------------------------------------------------------------------------------------------------------------------------------------------------------------------------------------------------------------------------------------------------------------------------------------------------------------------------------------------------------------------------------|---------------------------------------------------------------------------------------------------------|
| 513 | In the last two years have you stayed an overnight in a health centre/ health clinic/hospital?<br><b>IF NO SKIP TO 5600</b>                                                                                                                                                                                                                                                                                                                                                                                                                                                                                                                                                                                                                                                                                           | 1= Yes<br>2= No                                                                                         |
| 514 | How many times have you been hospitalized in the last 2 years?                                                                                                                                                                                                                                                                                                                                                                                                                                                                                                                                                                                                                                                                                                                                                        | Number of admissions<br>_____                                                                           |
| 515 | What type of hospital was it the last time you were hospitalized? Public, private or church run?                                                                                                                                                                                                                                                                                                                                                                                                                                                                                                                                                                                                                                                                                                                      | 1 = Public hospital<br>2 = Private hospital<br>3 = Charity or church run hospital<br>87 = Other Specify |
| 516 | <b>RECORD REASON HOSPITALISATION</b><br><b>ONLY ONE REASON</b><br>Which reason best describes why you were last hospitalized?<br><br>1= Communicable diseases, infections, malaria, infection TB, HIV<br>2= Nutritional deficiencies<br>3= Acute conditions, (diarrhea, flu, headaches, fever, cough and others)<br>4= Injury (if FALLS record 4 and fill in FALLS in 403a (SPECIFY)<br>5= Surgery<br>6= Sleep problem<br>7= Occupational /work related condition/injury<br>8= Chronic pain in joints/arthritis (joints, back, neck)<br>9= Diabetes or related complications<br>10= Problems with heart including unexplained pain in chest<br>11= Problems with mouth, teeth, swallowing<br>12= Problems with breathing<br>13= High blood pressure, hypertension<br>14= Stroke/ sudden paralysis of one side of body |                                                                                                         |



17

|      |                                                                                                                       |                                                                                          |
|------|-----------------------------------------------------------------------------------------------------------------------|------------------------------------------------------------------------------------------|
|      | 15= Generalized pain(stomach, muscle or other nonspecific pain)<br>16= Depression, anxiety<br>17= Cancer<br>87= Other |                                                                                          |
| 516a | Other best reason respondent was hospitalized                                                                         |                                                                                          |
| 517  | Who paid for this hospitalization?                                                                                    | Self                                                                                     |
|      |                                                                                                                       | Spouse                                                                                   |
|      |                                                                                                                       | Son/daughter                                                                             |
|      |                                                                                                                       | Other relative                                                                           |
|      |                                                                                                                       | Insurance                                                                                |
|      |                                                                                                                       | was free                                                                                 |
|      | Other                                                                                                                 |                                                                                          |
| 517a | Other paid hospitalization specify                                                                                    |                                                                                          |
| 518  | What was the outcome or result of your stay in the health centre/ health clinic/hospital? Did your condition...       | 1= Get much better<br>2= Get better<br>3= No change<br>4= Get worse<br>5= Get much worse |
| 519  | Was this the outcome or results you had expected?                                                                     | 1= yes<br>2= no                                                                          |

**SECTION 600: Participation (SINTEF)**

I'm going to ask you some questions about your involvement in different aspects of family, social life and society. Please listen to each one and answer yes, no, sometimes, sometimes or not applicable.

| Q. # | Question                                                                                                                                    | Codes |    |           |     |            | Go to Q            |
|------|---------------------------------------------------------------------------------------------------------------------------------------------|-------|----|-----------|-----|------------|--------------------|
|      |                                                                                                                                             | Yes   | No | Sometimes | N/A | Don't know |                    |
| 601  | Are you consulted about making household decisions?                                                                                         | 1     | 2  | 3         | 4   | 5          |                    |
| 602  | Do you go with the family to events such as family gatherings, weddings, thanksgivings, funerals and birthdays, and other social functions? | 1     | 2  | 3         | 4   | 5          |                    |
| 603  | Do you feel involved and part of the household or family?                                                                                   | 1     | 2  | 3         | 4   | 5          |                    |
| 604  | Does the family involve you in conversations?                                                                                               | 1     | 2  | 3         | 4   | 5          |                    |
| 605  | Does the family help you with daily activities/tasks?                                                                                       | 1     | 2  | 3         | 4   | 5          | "No, DK, N/A" →607 |
| 606  | Do you appreciate it or like the fact that you get this help?                                                                               | 1     | 2  | 3         | 4   | 5          |                    |
| 607  | Do you/did you take part in your own traditional practices (e.g initiation ceremonies)?                                                     | 1     | 2  | 3         | 4   | 5          |                    |
| 608  | Are you aware of organizations for people with disabilities (DPO)?                                                                          | 1     | 2  |           |     |            | "No" →610          |
| 609  | Are you a member of a DPO?                                                                                                                  | 1     | 2  |           |     |            |                    |
| 610  | Do you participate in local community meetings?                                                                                             | 1     | 2  | 3         | 4   | 5          | "No" →612          |
| 611  | Do you feel your voice is being heard?                                                                                                      | 1     | 2  |           |     | 5          |                    |
| 612  | Did you vote in the last election?                                                                                                          | 1     | 2  |           |     | 5          | "No" → sect 700    |
| 613  | Was it related to your disability that you didn't vote?                                                                                     | 1     | 2  |           |     | 5          |                    |

**Section 700: Attitudes (Model Disability Survey)**

Now I want to ask you some questions about the attitudes of people around you. When answering these questions please tell me on a scale from 1 to 5, where 1 is not at all and 5 means completely.

| Q. # | Question                                                                                                                                  | Codes              |   |   |   |                             |                         |
|------|-------------------------------------------------------------------------------------------------------------------------------------------|--------------------|---|---|---|-----------------------------|-------------------------|
|      |                                                                                                                                           | 1<br>Not at<br>all | 2 | 3 | 4 | 5<br>Yes,<br>complete<br>ly | 98<br>Not<br>applicable |
| 701  | Do you have problems getting involved in society because of the attitudes of others?                                                      | 1                  | 2 | 3 | 4 | 5                           | 98                      |
| 702  | Do you feel that some people treat you unfairly?                                                                                          | 1                  | 2 | 3 | 4 | 5                           | 98                      |
| 703  | Do you make your own choices about your day-to-day life? For example, where you go, what to eat.                                          | 1                  | 2 | 3 | 4 | 5                           | 98                      |
| 704  | Do you feel other people accept you?                                                                                                      | 1                  | 2 | 3 | 4 | 5                           | 98                      |
| 705  | Do you feel that other people respect you? For example, do you feel that others value you as a person and listen to what you have to say? | 1                  | 2 | 3 | 4 | 5                           | 98                      |
| 706  | Do you consider yourself a burden on society?                                                                                             | 1                  | 2 | 3 | 4 | 5                           | 98                      |
| 707  | Do people around you tend to become impatient with you?                                                                                   | 1                  | 2 | 3 | 4 | 5                           | 98                      |
| 708  | Do people around you not expect much from you?                                                                                            | 1                  | 2 | 3 | 4 | 5                           | 98                      |
| 709  | Is living with dignity a problem for you because of the attitudes and actions of others?                                                  | 1                  | 2 | 3 | 4 | 5                           | 98                      |

**SECTION 800: PLA-D****BASELINE only**

Now I would like to ask you some questions about your needs and expectations of the programme

| Nr. |                                                                                                              | CODE |
|-----|--------------------------------------------------------------------------------------------------------------|------|
| 801 | What are the three biggest issues that in your day-to-day life that you find difficult or need support with? |      |
| 802 | What are the three biggest issues related to your health you find difficult or need support with?            |      |
| 803 | What are your main goals for attending this group?                                                           |      |

**END-LINE only**

Now I would like to ask you some questions about your feelings about the programme?

Remind the participant of their goals from the baseline

| Nr. |                                                                                                         | CODE                                                                                                                  |
|-----|---------------------------------------------------------------------------------------------------------|-----------------------------------------------------------------------------------------------------------------------|
| 804 | Do you feel that you have achieved or met your goals?                                                   | 1=Not at all<br>2= Partially<br>3= Fully                                                                              |
| 805 | Please explain                                                                                          |                                                                                                                       |
| 806 | How satisfied were you with the content of the group programme?                                         | 1= Very dissatisfied<br>2= Dissatisfied<br>3= Neither satisfied nor dissatisfied<br>4= Satisfied<br>5= Very satisfied |
| 807 | How satisfied were you with the organization of the programme (e.g. transport, location, refreshments)? | 1= Very dissatisfied<br>2= Dissatisfied<br>3= Neither satisfied nor dissatisfied<br>4= Satisfied<br>5= Very satisfied |
| 808 | How satisfied were you with the facilitators of the programme?                                          | 1= Very dissatisfied<br>2= Dissatisfied<br>3= Neither satisfied nor dissatisfied<br>4= Satisfied<br>5= Very satisfied |
| 809 | Can you suggest ways in which the                                                                       |                                                                                                                       |

|  |                              |  |
|--|------------------------------|--|
|  | programme could be improved? |  |
|--|------------------------------|--|

|     |                 |                 |              |
|-----|-----------------|-----------------|--------------|
| 810 | RECORD THE TIME | ___ Hrs ___ Min | TIMEPART2END |
|-----|-----------------|-----------------|--------------|

**Closing statement and thank the respondent**  
*INTERVIEWER: This is the end of the interview*  
This completes the interview. We thank you for your time and answers. I have your contact details and may be in touch again.
