# Supplementary material
Source: HighWire-hosted journal article supplement (https://bmjopen.bmj.com/content/13/9/e074217)
Supplement: inline-supplementary-material-7 [file inline-supplementary-material-7.pdf]

MRC/UVRI and LSHTM Uganda Research Unit

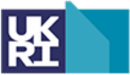

Medical  
Research  
Council

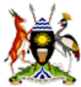

Uganda  
Virus  
Research  
Institute

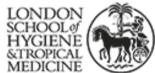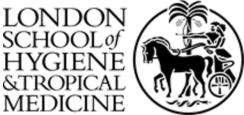

Observation of PLA-D group

The Missing Billion: Pilot-testing PLA-D groups to improve access to healthcare for people with disabilities in Uganda

**Objective:** To gather information to help further design a PLA-D group

Introduction

- Greet them and thank them for their time
- Identify yourself by name and organisation.
- Read out the information sheet. Remind them of confidentiality and anonymity. Check if they have any questions.
- Record their consent/assent in the relevant form OR record verbal consent.

**Notes:** the following details must be recorded in field notes

|                                                                                   |  |
|-----------------------------------------------------------------------------------|--|
| Group Code                                                                        |  |
| Observation date and time                                                         |  |
| Observation location                                                              |  |
| Observer name                                                                     |  |
| Participant gender (number men/women)                                             |  |
| General observations (anything which might impact how the interview is conducted) |  |

Observe the session and record your observations on the following page:

## MRC/UVRI and LSHTM Uganda Research Unit

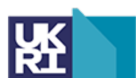

Medical  
Research  
Council

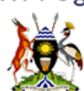

Uganda  
Virus  
Research  
Institute

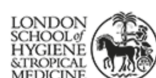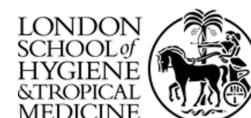

| Facilitation group checklist       | Activity demonstrated                                                                                   | Observed |    | Comment |
|------------------------------------|---------------------------------------------------------------------------------------------------------|----------|----|---------|
|                                    |                                                                                                         | Yes      | No |         |
| Logistics                          | The group was held at the date, time and location that was expected                                     |          |    |         |
|                                    | Number of facilitators who attended was the same as expected                                            |          |    |         |
|                                    | Number of participants who attended were the same as expected                                           |          |    |         |
|                                    | Group was conducted and ran according to schedule                                                       |          |    |         |
| Environment created by facilitator | Room/location set up was in a circular pattern with all participants included                           |          |    |         |
|                                    | Room/location was accessible                                                                            |          |    |         |
|                                    | The plan for the group session was discussed                                                            |          |    |         |
|                                    | Facilitators endeavoured to engage all the participants.                                                |          |    |         |
|                                    | Facilitators used inclusive/accessible communication styles                                             |          |    |         |
| Response of participants           | All participants contributed during the group, e.g. speaking to each other, speaking aloud in the group |          |    |         |
|                                    | Participants were distracted by competing interests, phone calls                                        |          |    |         |
|                                    | There was a clear outcome to the session (e.g. barrier identified, plan agreed)                         |          |    |         |
|                                    | Participants appeared positive and engaged about the group                                              |          |    |         |
